# Supplementary material for: Biochemical and Clinical Impact of Organic Uremic Retention Solutes: A Comprehensive Update
Source: PubMed Central journal article supplement (PMC5793120; doi:10.3390/toxins10010033), 2018-01-08
Supplement: toxins-10-00033-s001.pdf [file toxins-10-00033-s001.pdf]

**Supplemental table 1:** Experimental effects observed for the small water soluble compounds

|                                     | <i>Inflammation</i> | <i>CV<br/>D</i> | <i>CKD-MBD</i> | <i>Fibrosis</i> | <i>Infection</i> | <i>Insulin<br/>resistance</i> | <i>Metabolic<br/>function</i> | <i>PEW</i> | <i>Neurotoxicity</i> | <i>Thrombogenicity</i> | <i>Hematology</i> | <i>Sum</i> |
|-------------------------------------|---------------------|-----------------|----------------|-----------------|------------------|-------------------------------|-------------------------------|------------|----------------------|------------------------|-------------------|------------|
| <b>Guanidines*</b>                  |                     |                 |                |                 |                  |                               |                               |            |                      |                        |                   | 5          |
| ADMA                                |                     |                 |                |                 |                  |                               |                               |            |                      |                        |                   | 4          |
| SDMA                                |                     |                 |                |                 |                  |                               |                               |            |                      |                        |                   | 2          |
| Oxalate                             |                     |                 |                |                 |                  |                               |                               |            |                      |                        |                   | 3          |
| PAG                                 |                     |                 |                |                 |                  |                               |                               |            |                      |                        |                   | 0          |
| MMA                                 |                     |                 |                |                 |                  |                               |                               |            |                      |                        |                   | 1          |
| DMA                                 |                     |                 |                |                 |                  |                               |                               |            |                      |                        |                   | 1          |
| TMA                                 |                     |                 |                |                 |                  |                               |                               |            |                      |                        |                   | 2          |
| TMAO                                |                     |                 |                |                 |                  |                               |                               |            |                      |                        |                   | 5          |
| Lanthionine                         |                     |                 |                |                 |                  |                               |                               |            |                      |                        |                   | 1          |
| Myoinositol                         |                     |                 |                |                 |                  |                               |                               |            |                      |                        |                   | 1          |
| 2PY                                 |                     |                 |                |                 |                  |                               |                               |            |                      |                        |                   | 1          |
| <b>Polyamines**</b>                 |                     |                 |                |                 |                  |                               |                               |            |                      |                        |                   | 7          |
| Urea                                |                     |                 |                |                 |                  |                               |                               |            |                      |                        |                   | 3          |
| <b>Carbamylated<br/>compounds**</b> |                     |                 |                |                 |                  |                               |                               |            |                      |                        |                   | 3          |
| Cyanate                             |                     |                 |                |                 |                  |                               |                               |            |                      |                        |                   | 3          |
| Ammonia                             |                     |                 |                |                 |                  |                               |                               |            |                      |                        |                   | 1          |
| Uric acid                           |                     |                 |                |                 |                  |                               |                               |            |                      |                        |                   | 6          |
| Xanthine                            |                     |                 |                |                 |                  |                               |                               |            |                      |                        |                   | 2          |
| Hypoxanthine                        |                     |                 |                |                 |                  |                               |                               |            |                      |                        |                   | 2          |
| <b>Sum</b>                          | 10                  | 11              | 3              | 3               | 5                | 4                             | 8                             | 0          | 5                    | 2                      | 2                 |            |

Metabolic function includes tubular function; the term fibrosis also covers progression of CKD; CVD: Cardiovascular Disease; CKD-MBD: chronic kidney disease – metabolic bone disease; PEW: protein energy wasting; ADMA: Asymmetric Dimethylarginine; SDMA: Symmetric Dimethylarginine; PAG: Phenylacetylglutamate; MMA: Monomethylamine; DMA: Dimethylamine; TMA: Trimethylamine; TMAO: Trimethylamine-N-Oxide; 2PY: N-Methyl-2-Pyridone-carboxamide; \*: guanidines considered as one group with the exception of ADMA and SDMA; \*\*: polyamines and carbamylated compounds considered as one group. Colored for demonstrated effect. Bold characters are used for groups of compounds.

Opm: sterretjes aanpassen? \* en \*\* omwisselen om gelijk te trekken met figuur 2?

**Supplemental table 2:** Experimental effects observed for the protein bound compounds

|                      | <i>Inflam-<br/>mation</i> | <i>CVD</i> | <i>CKD-<br/>MBD</i> | <i>Fibrosis</i> | <i>Infection</i> | <i>Insulin<br/>resistance</i> | <i>Metabolic<br/>function</i> | <i>PEW</i> | <i>Neuro-<br/>toxicity</i> | <i>Thrombo-<br/>genicity</i> | <i>Hemato-<br/>logy</i> | <b>Sum</b> |
|----------------------|---------------------------|------------|---------------------|-----------------|------------------|-------------------------------|-------------------------------|------------|----------------------------|------------------------------|-------------------------|------------|
| <b>AGEs*</b>         |                           |            |                     |                 |                  |                               |                               |            |                            |                              |                         | 7          |
| <b>AOPPs*</b>        |                           |            |                     |                 |                  |                               |                               |            |                            |                              |                         | 3          |
| CMPF                 |                           |            |                     |                 |                  |                               |                               |            |                            |                              |                         | 2          |
| p-Cresyl sulfate     |                           |            |                     |                 |                  |                               |                               |            |                            |                              |                         | 7          |
| p-Cresyl glucuronide |                           |            |                     |                 |                  |                               |                               |            |                            |                              |                         | 2          |
| Hippuric acid        |                           |            |                     |                 |                  |                               |                               |            |                            |                              |                         | 3          |
| p-OH hippurate       |                           |            |                     |                 |                  |                               |                               |            |                            |                              |                         | 4          |
| o-OH hippurate       |                           |            |                     |                 |                  |                               |                               |            |                            |                              |                         | 2          |
| Homocysteine         |                           |            |                     |                 |                  |                               |                               |            |                            |                              |                         | 3          |
| Indoxyl sulfate      |                           |            |                     |                 |                  |                               |                               |            |                            |                              |                         | 6          |
| Indole acetic acid   |                           |            |                     |                 |                  |                               |                               |            |                            |                              |                         | 5          |
| Indoxyl glucuronide  |                           |            |                     |                 |                  |                               |                               |            |                            |                              |                         | 1          |
| <b>Kynurenines*</b>  |                           |            |                     |                 |                  |                               |                               |            |                            |                              |                         | 5          |
| Phenyl sulfate       |                           |            |                     |                 |                  |                               |                               |            |                            |                              |                         | 1          |
| Phenyl acetic acid   |                           |            |                     |                 |                  |                               |                               |            |                            |                              |                         | 5          |
| Quinolinic acid      |                           |            |                     |                 |                  |                               |                               |            |                            |                              |                         | 3          |
|                      |                           |            |                     |                 |                  |                               |                               |            |                            |                              |                         |            |
| <b>Sum</b>           | 11                        | 9          | 5                   | 8               | 2                | 4                             | 11                            | 0          | 4                          | 4                            | 1                       |            |

Metabolic function includes tubular function; fibrosis includes progression of CKD; CVD: Cardiovascular Disease; CKD-MBD: Chronic Kidney Disease – Metabolic Bone Disease; PEW: Protein Energy Wasting; AGEs: Advanced Glycation End Products, AOPPs: Advanced Oxidation protein Products; CMPF: Carboxy Methyl Propyl Furanpropionic Acid; p-OH hippurate: p-hydroxyhippurate; o-OH hippurate: o-hydroxyhippurate; \*: AGEs, AOPPs en kynurenines considered as one group. Colored for demonstrated effect. Bold characters are used for groups of compounds.



|                         |    |    |   |    |   |   |   |   |   |   |   |   |
|-------------------------|----|----|---|----|---|---|---|---|---|---|---|---|
| Neuropeptide Y          |    |    |   |    |   |   |   |   |   |   |   | 3 |
| Orexin A                |    |    |   |    |   |   |   |   |   |   |   | 1 |
| Parathyroid hormone     |    |    |   |    |   |   |   |   |   |   |   | 5 |
| Pentraxin-3             |    |    |   |    |   |   |   |   |   |   |   | 4 |
| Peptide YY              |    |    |   |    |   |   |   |   |   |   |   | 2 |
| Prolactin               |    |    |   |    |   |   |   |   |   |   |   | 1 |
| Resistin                |    |    |   |    |   |   |   |   |   |   |   | 2 |
| Retinol binding protein |    |    |   |    |   |   |   |   |   |   |   | 4 |
| Visfatin                |    |    |   |    |   |   |   |   |   |   |   | 0 |
|                         |    |    |   |    |   |   |   |   |   |   |   |   |
| Sum                     | 16 | 21 | 4 | 12 | 5 | 4 | 7 | 4 | 6 | 2 | 2 |   |

Metabolic function includes tubular function; fibrosis includes progression of CKD; CVD: Cardiovascular Disease; CKD-MBD: Chronic Kidney Disease – Metabolic Bone Disease; PEW: Protein Energy Wasting; ANP: atrial natriuretic peptide, TNF- $\alpha$ : Tumor Necrosis Factor- $\alpha$ , IgLC: Immunoglobulin Light Chains; MCSF: Macrophage Colony Stimulating Factor; \*: Immunoglobulin Light Chains and lipids and lipoproteins (modified) considered as one group; \*\*: modified – post-translational. Colored for demonstrated effect. Bold characters are used for groups of compounds.
